# Supplementary material for: The Multi-Omic Prognostic Model of Oxidative Stress-Related Genes in Acute Myeloid Leukemia
Source: Front Genet. 2021 Sep 30;12:722064. doi: 10.3389/fgene.2021.722064 (PMC8514868; doi:10.3389/fgene.2021.722064)
Supplement: Supplementary file 7 [file Table_1.XLS]

Id	futime	fustat	age	gender	grade	stage	T	M	N
TCGA-AB-2922	0	1	83	MALE	unknow	unknow	unknow	unknow	unknow
TCGA-AB-2823	0	1	61	FEMALE	unknow	unknow	unknow	unknow	unknow
TCGA-AB-2931	0	1	75	MALE	unknow	unknow	unknow	unknow	unknow
TCGA-AB-2941	0	1	73	MALE	unknow	unknow	unknow	unknow	unknow
TCGA-AB-2915	0	1	73	FEMALE	unknow	unknow	unknow	unknow	unknow
TCGA-AB-2932	0	0	62	MALE	unknow	unknow	unknow	unknow	unknow
TCGA-AB-2820	0	1	76	MALE	unknow	unknow	unknow	unknow	unknow
TCGA-AB-2903	0	1	76	FEMALE	unknow	unknow	unknow	unknow	unknow
TCGA-AB-2842	0	1	65	MALE	unknow	unknow	unknow	unknow	unknow
TCGA-AB-2890	0	1	69	MALE	unknow	unknow	unknow	unknow	unknow
TCGA-AB-2837	0	1	66	FEMALE	unknow	unknow	unknow	unknow	unknow
TCGA-AB-2910	0	1	61	FEMALE	unknow	unknow	unknow	unknow	unknow
TCGA-AB-2861	0	1	76	MALE	unknow	unknow	unknow	unknow	unknow
TCGA-AB-2934	28	0	65	MALE	unknow	unknow	unknow	unknow	unknow
TCGA-AB-2840	28	1	74	MALE	unknow	unknow	unknow	unknow	unknow
TCGA-AB-2972	30	1	82	FEMALE	unknow	unknow	unknow	unknow	unknow
TCGA-AB-2909	30	0	22	MALE	unknow	unknow	unknow	unknow	unknow
TCGA-AB-2824	30	1	45	MALE	unknow	unknow	unknow	unknow	unknow
TCGA-AB-2988	30	1	67	FEMALE	unknow	unknow	unknow	unknow	unknow
TCGA-AB-2863	31	1	63	MALE	unknow	unknow	unknow	unknow	unknow
TCGA-AB-2977	31	1	71	FEMALE	unknow	unknow	unknow	unknow	unknow
TCGA-AB-2908	31	1	81	MALE	unknow	unknow	unknow	unknow	unknow
TCGA-AB-2813	31	1	78	MALE	unknow	unknow	unknow	unknow	unknow
TCGA-AB-2998	31	1	68	FEMALE	unknow	unknow	unknow	unknow	unknow
TCGA-AB-2947	31	0	52	MALE	unknow	unknow	unknow	unknow	unknow
TCGA-AB-2952	31	1	60	FEMALE	unknow	unknow	unknow	unknow	unknow
TCGA-AB-2923	31	1	78	MALE	unknow	unknow	unknow	unknow	unknow
TCGA-AB-2810	31	1	76	FEMALE	unknow	unknow	unknow	unknow	unknow
TCGA-AB-2936	59	0	61	FEMALE	unknow	unknow	unknow	unknow	unknow
TCGA-AB-2901	59	0	27	MALE	unknow	unknow	unknow	unknow	unknow
TCGA-AB-2919	61	0	54	FEMALE	unknow	unknow	unknow	unknow	unknow
TCGA-AB-2850	61	1	72	FEMALE	unknow	unknow	unknow	unknow	unknow
TCGA-AB-2935	61	1	66	MALE	unknow	unknow	unknow	unknow	unknow
TCGA-AB-2865	61	1	75	MALE	unknow	unknow	unknow	unknow	unknow
TCGA-AB-2809	62	1	64	FEMALE	unknow	unknow	unknow	unknow	unknow
TCGA-AB-2853	89	1	51	MALE	unknow	unknow	unknow	unknow	unknow
TCGA-AB-2927	90	1	88	FEMALE	unknow	unknow	unknow	unknow	unknow
TCGA-AB-2924	90	0	59	MALE	unknow	unknow	unknow	unknow	unknow
TCGA-AB-2974	92	1	67	FEMALE	unknow	unknow	unknow	unknow	unknow
TCGA-AB-2844	122	1	63	MALE	unknow	unknow	unknow	unknow	unknow
TCGA-AB-2933	122	1	58	MALE	unknow	unknow	unknow	unknow	unknow
TCGA-AB-2929	123	1	71	FEMALE	unknow	unknow	unknow	unknow	unknow
TCGA-AB-2856	150	1	63	MALE	unknow	unknow	unknow	unknow	unknow
TCGA-AB-2982	150	0	29	FEMALE	unknow	unknow	unknow	unknow	unknow
TCGA-AB-2868	151	1	77	MALE	unknow	unknow	unknow	unknow	unknow
TCGA-AB-2895	153	1	41	FEMALE	unknow	unknow	unknow	unknow	unknow
TCGA-AB-2866	153	1	67	MALE	unknow	unknow	unknow	unknow	unknow
TCGA-AB-2871	153	0	51	MALE	unknow	unknow	unknow	unknow	unknow
TCGA-AB-2870	153	1	76	MALE	unknow	unknow	unknow	unknow	unknow
TCGA-AB-2807	181	1	68	FEMALE	unknow	unknow	unknow	unknow	unknow
TCGA-AB-2894	181	1	50	FEMALE	unknow	unknow	unknow	unknow	unknow
TCGA-AB-2886	181	0	26	MALE	unknow	unknow	unknow	unknow	unknow
TCGA-AB-2956	183	1	61	MALE	unknow	unknow	unknow	unknow	unknow
TCGA-AB-2900	184	1	70	MALE	unknow	unknow	unknow	unknow	unknow
TCGA-AB-2987	184	1	75	FEMALE	unknow	unknow	unknow	unknow	unknow
TCGA-AB-2867	184	1	66	FEMALE	unknow	unknow	unknow	unknow	unknow
TCGA-AB-2875	212	0	43	MALE	unknow	unknow	unknow	unknow	unknow
TCGA-AB-2986	212	1	31	FEMALE	unknow	unknow	unknow	unknow	unknow
TCGA-AB-2893	212	1	45	MALE	unknow	unknow	unknow	unknow	unknow
TCGA-AB-2855	212	1	18	MALE	unknow	unknow	unknow	unknow	unknow
TCGA-AB-2825	212	1	31	FEMALE	unknow	unknow	unknow	unknow	unknow
TCGA-AB-2885	214	1	71	MALE	unknow	unknow	unknow	unknow	unknow
TCGA-AB-2896	214	1	21	FEMALE	unknow	unknow	unknow	unknow	unknow
TCGA-AB-2937	215	1	36	FEMALE	unknow	unknow	unknow	unknow	unknow
TCGA-AB-2843	215	1	77	MALE	unknow	unknow	unknow	unknow	unknow
TCGA-AB-2851	242	1	66	FEMALE	unknow	unknow	unknow	unknow	unknow
TCGA-AB-2811	243	1	81	MALE	unknow	unknow	unknow	unknow	unknow
TCGA-AB-2945	243	1	65	FEMALE	unknow	unknow	unknow	unknow	unknow
TCGA-AB-2869	243	0	64	FEMALE	unknow	unknow	unknow	unknow	unknow
TCGA-AB-2925	243	1	57	MALE	unknow	unknow	unknow	unknow	unknow
TCGA-AB-2897	243	0	50	FEMALE	unknow	unknow	unknow	unknow	unknow
TCGA-AB-2834	245	1	33	MALE	unknow	unknow	unknow	unknow	unknow
TCGA-AB-2879	245	0	68	FEMALE	unknow	unknow	unknow	unknow	unknow
TCGA-AB-2816	245	1	57	FEMALE	unknow	unknow	unknow	unknow	unknow
TCGA-AB-2985	273	1	81	FEMALE	unknow	unknow	unknow	unknow	unknow
TCGA-AB-2873	273	0	51	FEMALE	unknow	unknow	unknow	unknow	unknow
TCGA-AB-2829	273	1	50	MALE	unknow	unknow	unknow	unknow	unknow
TCGA-AB-2827	273	1	33	MALE	unknow	unknow	unknow	unknow	unknow
TCGA-AB-2817	273	1	64	MALE	unknow	unknow	unknow	unknow	unknow
TCGA-AB-2912	274	1	63	MALE	unknow	unknow	unknow	unknow	unknow
TCGA-AB-2830	275	1	64	FEMALE	unknow	unknow	unknow	unknow	unknow
TCGA-AB-2818	303	1	62	FEMALE	unknow	unknow	unknow	unknow	unknow
TCGA-AB-2845	304	1	37	FEMALE	unknow	unknow	unknow	unknow	unknow
TCGA-AB-2938	304	1	76	MALE	unknow	unknow	unknow	unknow	unknow
TCGA-AB-2889	304	0	55	MALE	unknow	unknow	unknow	unknow	unknow
TCGA-AB-2859	304	1	40	MALE	unknow	unknow	unknow	unknow	unknow
TCGA-AB-2970	305	1	34	FEMALE	unknow	unknow	unknow	unknow	unknow
TCGA-AB-2950	306	0	34	FEMALE	unknow	unknow	unknow	unknow	unknow
TCGA-AB-2857	306	1	54	MALE	unknow	unknow	unknow	unknow	unknow
TCGA-AB-2888	334	0	57	MALE	unknow	unknow	unknow	unknow	unknow
TCGA-AB-2965	335	1	60	MALE	unknow	unknow	unknow	unknow	unknow
TCGA-AB-2983	335	1	45	MALE	unknow	unknow	unknow	unknow	unknow
TCGA-AB-2882	365	1	73	FEMALE	unknow	unknow	unknow	unknow	unknow
TCGA-AB-2838	365	1	67	MALE	unknow	unknow	unknow	unknow	unknow
TCGA-AB-2802	365	1	50	MALE	unknow	unknow	unknow	unknow	unknow
TCGA-AB-2989	365	1	29	MALE	unknow	unknow	unknow	unknow	unknow
TCGA-AB-2832	365	1	60	FEMALE	unknow	unknow	unknow	unknow	unknow
TCGA-AB-2878	365	1	47	FEMALE	unknow	unknow	unknow	unknow	unknow
TCGA-AB-2812	366	1	25	FEMALE	unknow	unknow	unknow	unknow	unknow
TCGA-AB-2854	366	1	51	FEMALE	unknow	unknow	unknow	unknow	unknow
TCGA-AB-2920	366	1	44	MALE	unknow	unknow	unknow	unknow	unknow
TCGA-AB-2898	393	0	69	FEMALE	unknow	unknow	unknow	unknow	unknow
TCGA-AB-2881	393	0	48	FEMALE	unknow	unknow	unknow	unknow	unknow
TCGA-AB-2874	396	0	59	MALE	unknow	unknow	unknow	unknow	unknow
TCGA-AB-2860	427	1	60	FEMALE	unknow	unknow	unknow	unknow	unknow
TCGA-AB-2848	455	1	62	MALE	unknow	unknow	unknow	unknow	unknow
TCGA-AB-2939	455	0	72	MALE	unknow	unknow	unknow	unknow	unknow
TCGA-AB-2833	456	1	77	MALE	unknow	unknow	unknow	unknow	unknow
TCGA-AB-2990	457	0	51	MALE	unknow	unknow	unknow	unknow	unknow
TCGA-AB-2926	457	1	57	FEMALE	unknow	unknow	unknow	unknow	unknow
TCGA-AB-2968	458	1	79	MALE	unknow	unknow	unknow	unknow	unknow
TCGA-AB-3006	485	1	61	MALE	unknow	unknow	unknow	unknow	unknow
TCGA-AB-2839	486	1	51	FEMALE	unknow	unknow	unknow	unknow	unknow
TCGA-AB-2981	487	0	35	FEMALE	unknow	unknow	unknow	unknow	unknow
TCGA-AB-2955	489	1	56	FEMALE	unknow	unknow	unknow	unknow	unknow
TCGA-AB-2959	489	1	71	MALE	unknow	unknow	unknow	unknow	unknow
TCGA-AB-2904	517	1	65	MALE	unknow	unknow	unknow	unknow	unknow
TCGA-AB-2836	518	1	35	MALE	unknow	unknow	unknow	unknow	unknow
TCGA-AB-3009	577	1	23	MALE	unknow	unknow	unknow	unknow	unknow
TCGA-AB-2906	577	0	59	MALE	unknow	unknow	unknow	unknow	unknow
TCGA-AB-2858	577	1	75	FEMALE	unknow	unknow	unknow	unknow	unknow
TCGA-AB-2805	577	1	77	MALE	unknow	unknow	unknow	unknow	unknow
TCGA-AB-2864	577	1	54	FEMALE	unknow	unknow	unknow	unknow	unknow
TCGA-AB-2948	580	1	67	MALE	unknow	unknow	unknow	unknow	unknow
TCGA-AB-2847	608	1	53	MALE	unknow	unknow	unknow	unknow	unknow
TCGA-AB-2973	609	1	68	FEMALE	unknow	unknow	unknow	unknow	unknow
TCGA-AB-2957	609	0	31	MALE	unknow	unknow	unknow	unknow	unknow
TCGA-AB-2872	638	0	42	MALE	unknow	unknow	unknow	unknow	unknow
TCGA-AB-2877	638	0	60	FEMALE	unknow	unknow	unknow	unknow	unknow
TCGA-AB-2831	640	1	59	MALE	unknow	unknow	unknow	unknow	unknow
TCGA-AB-2942	641	0	67	FEMALE	unknow	unknow	unknow	unknow	unknow
TCGA-AB-2979	671	0	30	FEMALE	unknow	unknow	unknow	unknow	unknow
TCGA-AB-2899	671	1	76	FEMALE	unknow	unknow	unknow	unknow	unknow
TCGA-AB-2980	699	0	50	MALE	unknow	unknow	unknow	unknow	unknow
TCGA-AB-2978	699	0	61	FEMALE	unknow	unknow	unknow	unknow	unknow
TCGA-AB-2949	699	0	58	MALE	unknow	unknow	unknow	unknow	unknow
TCGA-AB-2883	730	0	60	MALE	unknow	unknow	unknow	unknow	unknow
TCGA-AB-2884	731	1	44	FEMALE	unknow	unknow	unknow	unknow	unknow
TCGA-AB-2826	731	1	64	FEMALE	unknow	unknow	unknow	unknow	unknow
TCGA-AB-2993	761	1	57	FEMALE	unknow	unknow	unknow	unknow	unknow
TCGA-AB-2914	792	0	22	FEMALE	unknow	unknow	unknow	unknow	unknow
TCGA-AB-2971	792	1	76	FEMALE	unknow	unknow	unknow	unknow	unknow
TCGA-AB-2803	792	1	61	FEMALE	unknow	unknow	unknow	unknow	unknow
TCGA-AB-2814	792	1	39	FEMALE	unknow	unknow	unknow	unknow	unknow
TCGA-AB-2815	822	1	49	MALE	unknow	unknow	unknow	unknow	unknow
TCGA-AB-2821	822	1	64	MALE	unknow	unknow	unknow	unknow	unknow
TCGA-AB-3008	822	1	22	MALE	unknow	unknow	unknow	unknow	unknow
TCGA-AB-2966	854	1	57	FEMALE	unknow	unknow	unknow	unknow	unknow
TCGA-AB-2916	882	0	48	FEMALE	unknow	unknow	unknow	unknow	unknow
TCGA-AB-2976	915	1	53	MALE	unknow	unknow	unknow	unknow	unknow
TCGA-AB-2892	943	0	42	FEMALE	unknow	unknow	unknow	unknow	unknow
TCGA-AB-2806	945	1	46	MALE	unknow	unknow	unknow	unknow	unknow
TCGA-AB-2822	973	1	65	MALE	unknow	unknow	unknow	unknow	unknow
TCGA-AB-2967	1035	0	58	MALE	unknow	unknow	unknow	unknow	unknow
TCGA-AB-2969	1127	0	55	MALE	unknow	unknow	unknow	unknow	unknow
TCGA-AB-2984	1157	0	38	MALE	unknow	unknow	unknow	unknow	unknow
TCGA-AB-2911	1186	0	51	FEMALE	unknow	unknow	unknow	unknow	unknow
TCGA-AB-2913	1216	0	61	MALE	unknow	unknow	unknow	unknow	unknow
TCGA-AB-2917	1216	0	41	FEMALE	unknow	unknow	unknow	unknow	unknow
TCGA-AB-2876	1219	0	45	FEMALE	unknow	unknow	unknow	unknow	unknow
TCGA-AB-3000	1249	0	25	MALE	unknow	unknow	unknow	unknow	unknow
TCGA-AB-2964	1277	0	58	FEMALE	unknow	unknow	unknow	unknow	unknow
TCGA-AB-2841	1401	1	51	FEMALE	unknow	unknow	unknow	unknow	unknow
TCGA-AB-2846	1402	1	57	FEMALE	unknow	unknow	unknow	unknow	unknow
TCGA-AB-2862	1430	0	33	FEMALE	unknow	unknow	unknow	unknow	unknow
TCGA-AB-3002	1431	1	68	MALE	unknow	unknow	unknow	unknow	unknow
TCGA-AB-2954	1492	0	55	FEMALE	unknow	unknow	unknow	unknow	unknow
TCGA-AB-2995	1551	0	63	MALE	unknow	unknow	unknow	unknow	unknow
TCGA-AB-3007	1581	0	35	MALE	unknow	unknow	unknow	unknow	unknow
TCGA-AB-2996	1581	0	74	MALE	unknow	unknow	unknow	unknow	unknow
TCGA-AB-3001	1581	0	31	FEMALE	unknow	unknow	unknow	unknow	unknow
TCGA-AB-2905	1611	0	48	MALE	unknow	unknow	unknow	unknow	unknow
TCGA-AB-2963	1642	1	56	MALE	unknow	unknow	unknow	unknow	unknow
TCGA-AB-2835	1673	0	48	MALE	unknow	unknow	unknow	unknow	unknow
TCGA-AB-2992	1706	1	32	FEMALE	unknow	unknow	unknow	unknow	unknow
TCGA-AB-2999	1735	0	62	MALE	unknow	unknow	unknow	unknow	unknow
TCGA-AB-2994	1798	0	25	MALE	unknow	unknow	unknow	unknow	unknow
TCGA-AB-2991	1826	0	40	FEMALE	unknow	unknow	unknow	unknow	unknow
TCGA-AB-3011	1885	0	21	FEMALE	unknow	unknow	unknow	unknow	unknow
TCGA-AB-3012	1887	0	53	MALE	unknow	unknow	unknow	unknow	unknow
TCGA-AB-3005	2100	0	45	MALE	unknow	unknow	unknow	unknow	unknow
TCGA-AB-2849	2220	0	39	MALE	unknow	unknow	unknow	unknow	unknow
TCGA-AB-2828	2284	0	55	MALE	unknow	unknow	unknow	unknow	unknow
TCGA-AB-2819	2496	0	52	FEMALE	unknow	unknow	unknow	unknow	unknow
TCGA-AB-2804	2557	0	30	MALE	unknow	unknow	unknow	unknow	unknow
TCGA-AB-2808	2861	0	23	MALE	unknow	unknow	unknow	unknow	unknow
TCGA-AB-2918		1	47	FEMALE	unknow	unknow	unknow	unknow	unknow
TCGA-AB-2940		1	35	MALE	unknow	unknow	unknow	unknow	unknow
TCGA-AB-2907		1	69	MALE	unknow	unknow	unknow	unknow	unknow
TCGA-AB-2944		1	48	MALE	unknow	unknow	unknow	unknow	unknow
TCGA-AB-2891		1	42	MALE	unknow	unknow	unknow	unknow	unknow
TCGA-AB-2946		0	41	MALE	unknow	unknow	unknow	unknow	unknow
TCGA-AB-2880		1	24	MALE	unknow	unknow	unknow	unknow	unknow
TCGA-AB-2943		1	70	FEMALE	unknow	unknow	unknow	unknow	unknow
TCGA-AB-2975		1	54	MALE	unknow	unknow	unknow	unknow	unknow
TCGA-AB-2887		1	60	FEMALE	unknow	unknow	unknow	unknow	unknow
TCGA-AB-2997		1	25	FEMALE	unknow	unknow	unknow	unknow	unknow
TCGA-AB-2930		1	63	FEMALE	unknow	unknow	unknow	unknow	unknow
TCGA-AB-2921		1	56	FEMALE	unknow	unknow	unknow	unknow	unknow
TCGA-AB-2928		1	43	FEMALE	unknow	unknow	unknow	unknow	unknow
