# Supplementary material for: The Multi-Omic Prognostic Model of Oxidative Stress-Related Genes in Acute Myeloid Leukemia
Source: Front Genet. 2021 Sep 30;12:722064. doi: 10.3389/fgene.2021.722064 (PMC8514868; doi:10.3389/fgene.2021.722064)
Supplement: Supplementary file 8 [file Table_2.XLSX]

## Sheet: Sheet1
samID	riskscore	riskgroup	cohort
TCGA-AB-2805-03A-01T-0734-13	0.233923	HRisk	TCGA training
TCGA-AB-2810-03A-01T-0736-13	0.0321278	HRisk	TCGA training
TCGA-AB-2811-03B-01T-0760-13	0.561065	HRisk	TCGA training
TCGA-AB-2812-03A-01T-0734-13	-0.110742	LRisk	TCGA training
TCGA-AB-2813-03A-01T-0736-13	0.399251	HRisk	TCGA training
TCGA-AB-2814-03A-01T-0734-13	0.218083	HRisk	TCGA training
TCGA-AB-2815-03A-01T-0734-13	-0.0103494	LRisk	TCGA training
TCGA-AB-2817-03A-01T-0736-13	0.192731	HRisk	TCGA training
TCGA-AB-2819-03A-01T-0734-13	-0.326191	LRisk	TCGA training
TCGA-AB-2821-03A-01T-0735-13	0.108226	HRisk	TCGA training
TCGA-AB-2822-03A-01T-0734-13	-0.100752	LRisk	TCGA training
TCGA-AB-2825-03A-01T-0736-13	0.608881	HRisk	TCGA training
TCGA-AB-2830-03A-01T-0736-13	0.438928	HRisk	TCGA training
TCGA-AB-2834-03A-01T-0734-13	-0.0718903	LRisk	TCGA training
TCGA-AB-2835-03A-01T-0736-13	0.333361	HRisk	TCGA training
TCGA-AB-2836-03A-01T-0736-13	0.328195	HRisk	TCGA training
TCGA-AB-2839-03A-01T-0734-13	-0.0965778	LRisk	TCGA training
TCGA-AB-2840-03A-01T-0734-13	0.0380879	HRisk	TCGA training
TCGA-AB-2841-03B-01T-0760-13	-0.623375	LRisk	TCGA training
TCGA-AB-2844-03A-01T-0736-13	-0.191163	LRisk	TCGA training
TCGA-AB-2846-03A-01T-0736-13	-0.126449	LRisk	TCGA training
TCGA-AB-2849-03A-01T-0734-13	-0.400516	LRisk	TCGA training
TCGA-AB-2851-03A-01T-0736-13	0.388476	HRisk	TCGA training
TCGA-AB-2853-03A-01T-0734-13	-0.237486	LRisk	TCGA training
TCGA-AB-2856-03A-01T-0736-13	0.533832	HRisk	TCGA training
TCGA-AB-2858-03A-01T-0736-13	-0.273114	LRisk	TCGA training
TCGA-AB-2862-03A-01T-0736-13	-0.28116	LRisk	TCGA training
TCGA-AB-2863-03A-01T-0734-13	0.0390726	HRisk	TCGA training
TCGA-AB-2865-03A-01T-0736-13	0.322978	HRisk	TCGA training
TCGA-AB-2866-03A-01T-0736-13	0.41753	HRisk	TCGA training
TCGA-AB-2867-03A-01T-0734-13	-0.0035611	LRisk	TCGA training
TCGA-AB-2869-03A-01T-0735-13	0.102771	HRisk	TCGA training
TCGA-AB-2870-03A-01T-0735-13	0.0576507	HRisk	TCGA training
TCGA-AB-2871-03A-01T-0735-13	0.0608325	HRisk	TCGA training
TCGA-AB-2872-03A-01T-0735-13	-0.299545	LRisk	TCGA training
TCGA-AB-2874-03A-01T-0735-13	-0.496375	LRisk	TCGA training
TCGA-AB-2875-03A-01T-0735-13	-0.280452	LRisk	TCGA training
TCGA-AB-2876-03A-01T-0734-13	-0.319632	LRisk	TCGA training
TCGA-AB-2877-03A-01T-0735-13	-0.288654	LRisk	TCGA training
TCGA-AB-2878-03A-01T-0734-13	-0.276157	LRisk	TCGA training
TCGA-AB-2881-03A-01T-0735-13	-0.116884	LRisk	TCGA training
TCGA-AB-2882-03A-01T-0740-13	0.104766	HRisk	TCGA training
TCGA-AB-2883-03A-01T-0734-13	-0.304439	LRisk	TCGA training
TCGA-AB-2885-03A-01T-0735-13	0.336395	HRisk	TCGA training
TCGA-AB-2886-03A-01T-0735-13	-0.473684	LRisk	TCGA training
TCGA-AB-2888-03B-01T-0748-13	0.298633	HRisk	TCGA training
TCGA-AB-2889-03A-01T-0735-13	-0.176446	LRisk	TCGA training
TCGA-AB-2892-03A-01T-0734-13	-0.0854798	LRisk	TCGA training
TCGA-AB-2893-03A-01T-0734-13	0.477331	HRisk	TCGA training
TCGA-AB-2894-03A-01T-0734-13	0.140694	HRisk	TCGA training
TCGA-AB-2895-03A-01T-0735-13	0.181849	HRisk	TCGA training
TCGA-AB-2896-03B-01T-0751-13	0.205969	HRisk	TCGA training
TCGA-AB-2899-03A-01T-0736-13	0.310989	HRisk	TCGA training
TCGA-AB-2900-03A-01T-0735-13	0.240948	HRisk	TCGA training
TCGA-AB-2901-03A-01T-0735-13	0.151773	HRisk	TCGA training
TCGA-AB-2908-03A-01T-0740-13	0.226396	HRisk	TCGA training
TCGA-AB-2911-03A-01T-0734-13	0.037236	HRisk	TCGA training
TCGA-AB-2912-03A-01T-0734-13	-0.0671376	LRisk	TCGA training
TCGA-AB-2914-03A-01T-0734-13	-0.318806	LRisk	TCGA training
TCGA-AB-2917-03A-01T-0734-13	-0.506428	LRisk	TCGA training
TCGA-AB-2919-03A-01T-0740-13	-0.39903	LRisk	TCGA training
TCGA-AB-2920-03B-01T-0760-13	0.504761	HRisk	TCGA training
TCGA-AB-2925-03A-01T-0735-13	0.436959	HRisk	TCGA training
TCGA-AB-2927-03A-01T-0740-13	0.162187	HRisk	TCGA training
TCGA-AB-2929-03A-01T-0735-13	0.272502	HRisk	TCGA training
TCGA-AB-2936-03A-01T-0740-13	-0.248559	LRisk	TCGA training
TCGA-AB-2937-03A-01T-0734-13	0.319943	HRisk	TCGA training
TCGA-AB-2938-03A-01T-0736-13	0.270605	HRisk	TCGA training
TCGA-AB-2939-03A-01T-0740-13	-0.0288036	LRisk	TCGA training
TCGA-AB-2942-03A-01T-0734-13	-0.100831	LRisk	TCGA training
TCGA-AB-2948-03A-01T-0740-13	0.144165	HRisk	TCGA training
TCGA-AB-2950-03A-01T-0735-13	-0.39375	LRisk	TCGA training
TCGA-AB-2952-03B-01T-0760-13	0.998385	HRisk	TCGA training
TCGA-AB-2955-03A-01T-0734-13	-0.280702	LRisk	TCGA training
TCGA-AB-2956-03A-01T-0740-13	0.422213	HRisk	TCGA training
TCGA-AB-2959-03A-01T-0734-13	-0.11266	LRisk	TCGA training
TCGA-AB-2963-03A-01T-0734-13	-0.168652	LRisk	TCGA training
TCGA-AB-2965-03A-01T-0734-13	0.118855	HRisk	TCGA training
TCGA-AB-2966-03A-01T-0734-13	0.0705934	HRisk	TCGA training
TCGA-AB-2970-03A-01T-0734-13	0.215518	HRisk	TCGA training
TCGA-AB-2971-03A-01T-0734-13	-0.111948	LRisk	TCGA training
TCGA-AB-2973-03A-01T-0734-13	0.298471	HRisk	TCGA training
TCGA-AB-2979-03B-01T-0760-13	0.163207	HRisk	TCGA training
TCGA-AB-2980-03A-01T-0734-13	-0.366677	LRisk	TCGA training
TCGA-AB-2981-03B-01T-0748-13	0.461225	HRisk	TCGA training
TCGA-AB-2982-03B-01T-0748-13	-0.519611	LRisk	TCGA training
TCGA-AB-2983-03A-01T-0734-13	-0.0092079	LRisk	TCGA training
TCGA-AB-2984-03A-01T-0734-13	-0.153375	LRisk	TCGA training
TCGA-AB-2986-03A-01T-0734-13	0.215727	HRisk	TCGA training
TCGA-AB-2987-03A-01T-0734-13	0.780918	HRisk	TCGA training
TCGA-AB-2990-03B-01T-0748-13	-0.270079	LRisk	TCGA training
TCGA-AB-2991-03A-01T-0735-13	-0.709694	LRisk	TCGA training
TCGA-AB-2992-03A-01T-0735-13	-0.0116518	LRisk	TCGA training
TCGA-AB-2994-03A-01T-0735-13	-0.327605	LRisk	TCGA training
TCGA-AB-2995-03A-01T-0735-13	-0.0123001	LRisk	TCGA training
TCGA-AB-2996-03A-01T-0735-13	-0.0493135	LRisk	TCGA training
TCGA-AB-2998-03A-01T-0735-13	0.209813	HRisk	TCGA training
TCGA-AB-2999-03B-01T-0748-13	-0.761826	LRisk	TCGA training
TCGA-AB-3000-03A-01T-0736-13	-0.137197	LRisk	TCGA training
TCGA-AB-3001-03A-01T-0736-13	-0.932439	LRisk	TCGA training
TCGA-AB-3002-03A-01T-0736-13	0.0586778	HRisk	TCGA training
TCGA-AB-3008-03A-01T-0736-13	0.134658	HRisk	TCGA training
TCGA-AB-3009-03A-01T-0736-13	-0.391387	LRisk	TCGA training
TCGA-AB-3012-03A-01T-0736-13	-1.02762	LRisk	TCGA training
TCGA-AB-2806-03A-01T-0734-13	-0.698469	LRisk	TCGA testing
TCGA-AB-2808-03A-01T-0734-13	-0.275005	LRisk	TCGA testing
TCGA-AB-2818-03A-01T-0734-13	-0.108713	LRisk	TCGA testing
TCGA-AB-2826-03A-01T-0734-13	-0.109732	LRisk	TCGA testing
TCGA-AB-2828-03A-01T-0734-13	-0.058756	LRisk	TCGA testing
TCGA-AB-2843-03A-01T-0736-13	0.39581	HRisk	TCGA testing
TCGA-AB-2845-03B-01T-0748-13	-0.195956	LRisk	TCGA testing
TCGA-AB-2847-03A-01T-0736-13	0.230436	HRisk	TCGA testing
TCGA-AB-2857-03A-01T-0736-13	0.137435	HRisk	TCGA testing
TCGA-AB-2859-03A-01T-0736-13	0.216211	HRisk	TCGA testing
TCGA-AB-2873-03A-01T-0735-13	0.599048	HRisk	TCGA testing
TCGA-AB-2884-03A-01T-0735-13	0.355606	HRisk	TCGA testing
TCGA-AB-2897-03A-01T-0735-13	-0.263461	LRisk	TCGA testing
TCGA-AB-2898-03A-01T-0735-13	0.173812	HRisk	TCGA testing
TCGA-AB-2913-03A-01T-0734-13	-0.500298	LRisk	TCGA testing
TCGA-AB-2916-03A-01T-0734-13	0.275956	HRisk	TCGA testing
TCGA-AB-2924-03A-01T-0740-13	-0.158376	LRisk	TCGA testing
TCGA-AB-2933-03A-01T-0734-13	0.233602	HRisk	TCGA testing
TCGA-AB-2934-03A-01T-0740-13	0.483231	HRisk	TCGA testing
TCGA-AB-2935-03A-01T-0740-13	0.133917	HRisk	TCGA testing
TCGA-AB-2949-03B-01T-0748-13	-0.1716	LRisk	TCGA testing
TCGA-AB-2976-03A-01T-0734-13	0.00384421	LRisk	TCGA testing
TCGA-AB-2977-03B-01T-0760-13	0.572396	HRisk	TCGA testing
TCGA-AB-2988-03B-01T-0748-13	0.156441	HRisk	TCGA testing
TCGA-AB-3007-03A-01T-0736-13	-0.81181	LRisk	TCGA testing
TCGA-AB-3011-03A-01T-0736-13	-0.61557	LRisk	TCGA testing
GSM515705	-0.378511	LRisk	geo1 validating
GSM515707	-0.778642	LRisk	geo1 validating
GSM515714	0.184619	HRisk	geo1 validating
GSM515717	0.0388738	HRisk	geo1 validating
GSM515727	-0.408319	LRisk	geo1 validating
GSM515728	-0.573884	LRisk	geo1 validating
GSM515736	0.123405	HRisk	geo1 validating
GSM515739	-0.307482	LRisk	geo1 validating
GSM515745	0.115962	HRisk	geo1 validating
GSM515749	-0.0177797	LRisk	geo1 validating
GSM515752	-0.0143755	LRisk	geo1 validating
GSM515754	0.150057	HRisk	geo1 validating
GSM515770	0.0938437	HRisk	geo1 validating
GSM515780	0.165492	HRisk	geo1 validating
GSM515782	-0.14515	LRisk	geo1 validating
GSM515791	0.0244716	HRisk	geo1 validating
GSM515797	0.233996	HRisk	geo1 validating
GSM515798	0.143108	HRisk	geo1 validating
GSM515800	-0.109251	LRisk	geo1 validating
GSM515803	-0.429469	LRisk	geo1 validating
GSM515805	0.432222	HRisk	geo1 validating
GSM515809	0.134302	HRisk	geo1 validating
GSM515817	0.373989	HRisk	geo1 validating
GSM515832	0.23567	HRisk	geo1 validating
GSM515838	-0.0664899	LRisk	geo1 validating
GSM515841	-0.11389	LRisk	geo1 validating
GSM515842	0.0369947	HRisk	geo1 validating
GSM515856	-0.293432	LRisk	geo1 validating
GSM515858	0.221378	HRisk	geo1 validating
GSM515869	-0.195024	LRisk	geo1 validating
GSM515872	0.188666	HRisk	geo1 validating
GSM515873	-0.0352127	LRisk	geo1 validating
GSM515884	0.559745	HRisk	geo1 validating
GSM515888	0.157756	HRisk	geo1 validating
GSM515895	0.287595	HRisk	geo1 validating
GSM515897	-0.31283	LRisk	geo1 validating
GSM515902	-0.181192	LRisk	geo1 validating
GSM515904	-0.117329	LRisk	geo1 validating
GSM515906	0.082003	HRisk	geo1 validating
GSM515911	-0.496038	LRisk	geo1 validating
GSM515915	-0.133451	LRisk	geo1 validating
GSM515918	-0.33807	LRisk	geo1 validating
GSM515928	0.0388435	HRisk	geo1 validating
GSM515934	-0.00237867	LRisk	geo1 validating
GSM515939	-0.000710612	LRisk	geo1 validating
GSM515940	-0.237233	LRisk	geo1 validating
GSM515943	0.127204	HRisk	geo1 validating
GSM515944	0.0943393	HRisk	geo1 validating
GSM515945	-0.0295379	LRisk	geo1 validating
GSM515947	0.220935	HRisk	geo1 validating
GSM515960	0.087384	HRisk	geo1 validating
GSM515962	0.046996	HRisk	geo1 validating
GSM515964	0.00662225	LRisk	geo1 validating
GSM515971	-0.231962	LRisk	geo1 validating
GSM515972	0.221023	HRisk	geo1 validating
GSM515999	-0.254957	LRisk	geo1 validating
GSM516000	0.106788	HRisk	geo1 validating
GSM516003	0.0260837	HRisk	geo1 validating
GSM516005	-0.0202762	LRisk	geo1 validating
GSM516015	0.111406	HRisk	geo1 validating
GSM516025	0.17492	HRisk	geo1 validating
GSM516026	-0.0905048	LRisk	geo1 validating
GSM516027	-0.167489	LRisk	geo1 validating
GSM516030	-0.0308563	LRisk	geo1 validating
GSM516032	0.0189189	LRisk	geo1 validating
GSM516037	0.299742	HRisk	geo1 validating
GSM516047	0.126106	HRisk	geo1 validating
GSM516050	-0.0867152	LRisk	geo1 validating
GSM516056	0.000357797	LRisk	geo1 validating
GSM516059	0.0871816	HRisk	geo1 validating
GSM516064	-0.210489	LRisk	geo1 validating
GSM516077	-0.0321276	LRisk	geo1 validating
GSM516079	-0.291792	LRisk	geo1 validating
GSM516085	0.426505	HRisk	geo1 validating
GSM516086	0.0451675	HRisk	geo1 validating
GSM516089	0.26736	HRisk	geo1 validating
GSM516090	-0.0796828	LRisk	geo1 validating
GSM516421	0.148995	HRisk	geo1 validating
GSM516427	-0.0972852	LRisk	geo1 validating
GSM516432	-0.267273	LRisk	geo1 validating
GSM516433	-0.338082	LRisk	geo1 validating
GSM516441	-0.0207075	LRisk	geo1 validating
GSM516445	0.306329	HRisk	geo1 validating
GSM516451	0.392981	HRisk	geo1 validating
GSM516452	0.510881	HRisk	geo1 validating
GSM516459	0.0586605	HRisk	geo1 validating
GSM1825455	0.0774613	HRisk	geo2 validating
GSM1825456	-0.249491	LRisk	geo2 validating
GSM1825457	-0.27343	LRisk	geo2 validating
GSM1825458	-0.441469	LRisk	geo2 validating
GSM1825459	-0.123166	LRisk	geo2 validating
GSM1825460	-0.403002	LRisk	geo2 validating
GSM1825461	-0.212872	LRisk	geo2 validating
GSM1825462	-0.302382	LRisk	geo2 validating
GSM1825463	-0.10304	LRisk	geo2 validating
GSM1825464	-0.551878	LRisk	geo2 validating
GSM1825465	-0.221787	LRisk	geo2 validating
GSM1825466	0.0275979	HRisk	geo2 validating
GSM1825467	0.472348	HRisk	geo2 validating
GSM1825468	0.27475	HRisk	geo2 validating
GSM1825469	0.267758	HRisk	geo2 validating
GSM1825470	-0.315489	LRisk	geo2 validating
GSM1825471	-0.372906	LRisk	geo2 validating
GSM1825472	-0.3188	LRisk	geo2 validating
GSM1825473	0.122835	HRisk	geo2 validating
GSM1825474	-0.321466	LRisk	geo2 validating
GSM1825475	-0.271939	LRisk	geo2 validating
GSM1825476	0.588446	HRisk	geo2 validating
GSM1825477	0.138628	HRisk	geo2 validating
GSM1825478	0.632116	HRisk	geo2 validating
GSM1825479	-0.119165	LRisk	geo2 validating
GSM1825480	0.281349	HRisk	geo2 validating
GSM1825481	0.131751	HRisk	geo2 validating
GSM1825482	-0.102327	LRisk	geo2 validating
GSM1825483	0.170719	HRisk	geo2 validating
GSM1825484	-0.26469	LRisk	geo2 validating
GSM1825485	0.0158652	HRisk	geo2 validating
GSM1825486	0.154565	HRisk	geo2 validating
GSM1825487	0.133895	HRisk	geo2 validating
GSM1825488	0.567534	HRisk	geo2 validating
GSM1825489	-0.0415839	HRisk	geo2 validating
GSM1825490	-0.0937079	LRisk	geo2 validating
GSM1825491	0.0973896	HRisk	geo2 validating
GSM1825492	0.208439	HRisk	geo2 validating
GSM1825493	0.328122	HRisk	geo2 validating
GSM1825494	-0.000935717	HRisk	geo2 validating
GSM1825495	0.0335624	HRisk	geo2 validating
GSM1825496	-0.161115	LRisk	geo2 validating
GSM1825497	0.366386	HRisk	geo2 validating
GSM1825498	0.0410593	HRisk	geo2 validating
GSM1825499	-0.190148	LRisk	geo2 validating
GSM1825500	0.551745	HRisk	geo2 validating
GSM1825501	-0.126709	LRisk	geo2 validating
GSM1825502	0.153279	HRisk	geo2 validating
GSM1825503	0.981535	HRisk	geo2 validating
GSM1825504	0.858849	HRisk	geo2 validating
GSM1825505	-0.3483	LRisk	geo2 validating
GSM1825506	0.693696	HRisk	geo2 validating
GSM1825507	0.333953	HRisk	geo2 validating
GSM1825508	1.07402	HRisk	geo2 validating
GSM1825509	0.147761	HRisk	geo2 validating
GSM1825510	0.0358731	HRisk	geo2 validating
GSM1825511	-0.192644	LRisk	geo2 validating
GSM1825512	-0.787943	LRisk	geo2 validating
GSM1825513	-0.497821	LRisk	geo2 validating
GSM1825514	-0.274137	LRisk	geo2 validating
GSM1825515	-0.248097	LRisk	geo2 validating
GSM1825516	-0.235036	LRisk	geo2 validating
GSM1825517	-0.0207053	HRisk	geo2 validating
GSM1825518	-0.131252	LRisk	geo2 validating
GSM1825519	0.0948959	HRisk	geo2 validating
GSM1825520	-0.15416	LRisk	geo2 validating
GSM1825521	0.162811	HRisk	geo2 validating
GSM1825522	0.479393	HRisk	geo2 validating
GSM1825523	-0.508262	LRisk	geo2 validating
GSM1825524	0.122807	HRisk	geo2 validating
GSM1825525	-0.367954	LRisk	geo2 validating
GSM1825526	0.133942	HRisk	geo2 validating
GSM1825527	-0.667285	LRisk	geo2 validating
GSM1825528	-0.506351	LRisk	geo2 validating
GSM1825529	0.818414	HRisk	geo2 validating
GSM1825530	-0.182763	LRisk	geo2 validating
GSM1825531	-0.0862525	LRisk	geo2 validating
GSM1825532	0.0554055	HRisk	geo2 validating
GSM1825533	0.560331	HRisk	geo2 validating
GSM1825534	-0.297698	LRisk	geo2 validating
GSM1825535	-0.3055	LRisk	geo2 validating
GSM1825536	-0.11957	LRisk	geo2 validating
GSM1825537	0.0566486	HRisk	geo2 validating
GSM1825538	0.365377	HRisk	geo2 validating
GSM1825539	0.199024	HRisk	geo2 validating
GSM1825540	-0.113549	LRisk	geo2 validating
GSM1825541	-0.00306924	HRisk	geo2 validating
GSM1825542	0.0786313	HRisk	geo2 validating
GSM1825543	-0.18135	LRisk	geo2 validating
GSM1825544	-0.258299	LRisk	geo2 validating
GSM1825545	-0.201164	LRisk	geo2 validating
GSM1825546	-0.179605	LRisk	geo2 validating
GSM1825547	-0.358027	LRisk	geo2 validating
GSM1825548	-0.0569568	LRisk	geo2 validating
GSM1825549	0.408753	HRisk	geo2 validating
GSM1825550	0.251887	HRisk	geo2 validating
GSM1825551	0.41194	HRisk	geo2 validating
GSM1825552	-0.363524	LRisk	geo2 validating
GSM1825553	-0.282335	LRisk	geo2 validating
GSM1825554	-0.236975	LRisk	geo2 validating
GSM1825555	0.149745	HRisk	geo2 validating
GSM1825556	0.00847049	HRisk	geo2 validating
GSM1825557	-0.227812	LRisk	geo2 validating
GSM1825558	-0.34387	LRisk	geo2 validating
